# Supplementary material for: Single-Side Superhydrophobicity in Si3N4-Doped and SiO2-Treated Polypropylene Nonwoven Webs with Antibacterial Activity
Source: MDPI journal article supplement (doi:10.3390/polym14142952), 2022-07-21
Supplement: s1 [file s1]

**Single-side superhydrophobicity in Si<sub>3</sub>N<sub>4</sub>-doped and SiO<sub>2</sub>-treated polypropylene nonwoven webs with antibacterial activity and good performances**

Ming-Chao Han <sup>1</sup>, Shun-Zhong Cai <sup>1</sup>, Ji Wang<sup>1</sup>, Hong-Wei He <sup>1,2\*</sup>

<sup>1</sup>*Shandong Center for Engineered Nonwovens, Industrial Research Institute of Nonwovens & Technical Textiles, College of Textiles & Clothing, Qingdao University, Qingdao 266071, Shandong, China.*

<sup>2</sup>*State Key Laboratory of Bio-Fibers and Eco-Textiles, Qingdao University, Qingdao 266071, Shandong, China*

Correspondence should be addressed to [hhwpost@163.com](mailto:hhwpost@163.com)

### Melt flow rate measurement

The flow performance of electret masterbatch was tested by a melt flow rate meter (XNR-400a, Jinhe, China). The test method was according to GB/T 3682-2000, the test temperature was 230°C and the nominal load was 2.16kg.

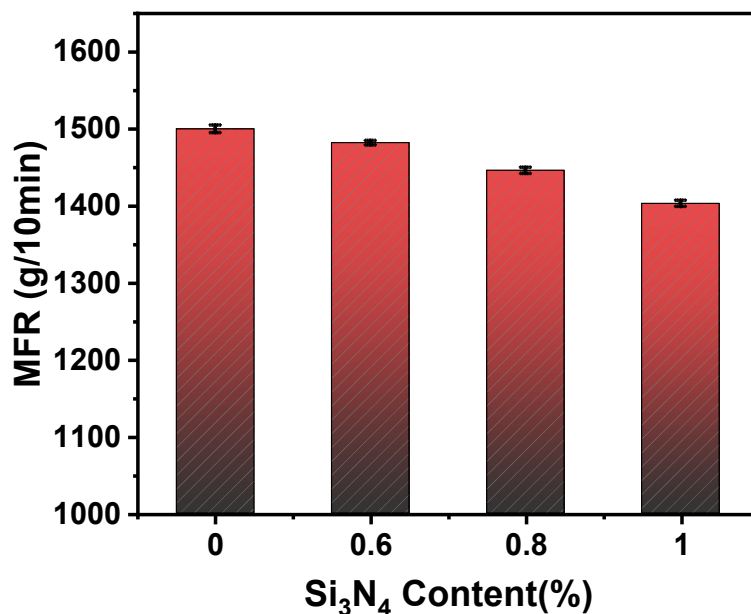

Figure.S1 Flow rates of masterbatch melt with different Si<sub>3</sub>N<sub>4</sub> contents

As shown in Figure.S1, with the increase of silicon nitride content, the flowability of PP becomes worse, decreasing from 1500 g/1000 min to 1403 g/10 min. The addition of silicon nitride increases the viscosity of the PP system, and the flow performance deteriorates.
